# Supplementary material for: Research trends on the relationship between gut microbiota and colorectal cancer: A bibliometric analysis
Source: PubMed Central journal article supplement (PMC9868464; doi:10.3389/fcimb.2022.1027448), 2023-01-09
Supplement: DataSheet_1.pdf [file DataSheet_1.pdf]

**Table S1: The top 10 most productive countries/regions in the field of microbiota and colorectal cancer research from 2001-2022.**

---

| <b>Countries/Regions</b> | <b>Publications</b> | <b>H-index</b> | <b>Citations</b> | <b>Citations per-publication</b> |
|--------------------------|---------------------|----------------|------------------|----------------------------------|
| China                    | 361                 | 50             | 12538            | 34.73                            |
| USA                      | 166                 | 61             | 14881            | 89.65                            |
| South Korea              | 56                  | 23             | 1779             | 31.77                            |
| Japan                    | 50                  | 24             | 3205             | 64.10                            |
| Italy                    | 45                  | 19             | 2004             | 44.53                            |
| Iran                     | 44                  | 17             | 816              | 18.55                            |
| France                   | 35                  | 21             | 4138             | 118.23                           |
| Germany                  | 29                  | 16             | 2692             | 92.83                            |
| Spain                    | 25                  | 14             | 837              | 33.48                            |
| Brazil                   | 23                  | 14             | 638              | 27.57                            |

---
