# Supplementary material for: Research trends on the relationship between gut microbiota and colorectal cancer: A bibliometric analysis
Source: PubMed Central journal article supplement (PMC9868464; doi:10.3389/fcimb.2022.1027448), 2023-01-09
Supplement: DataSheet_2.pdf [file DataSheet_2.pdf]

**Table S2: The top 10 most productive institutions in the field of microbiota and colorectal cancer research from 2001-2022.**

| <b>Institutions</b>                   | <b>Publications</b> | <b>H-index</b> | <b>Citations</b> | <b>Citations per-publication</b> |
|---------------------------------------|---------------------|----------------|------------------|----------------------------------|
| Shanghai Jiao Tong University         | 36                  | 22             | 3538             | 98.28                            |
| Zhejiang University                   | 31                  | 16             | 1438             | 46.39                            |
| Chinese University of Hong Kong       | 21                  | 15             | 1677             | 79.86                            |
| Tongji University                     | 18                  | 12             | 965              | 53.61                            |
| Fudan University                      | 16                  | 11             | 1567             | 97.94                            |
| Seoul National University             | 16                  | 11             | 370              | 23.13                            |
| Harvard Medical School                | 15                  | 11             | 1268             | 84.53                            |
| Tehran University of Medical Sciences | 15                  | 10             | 221              | 14.73                            |
| Tabriz University of Medical Sciences | 14                  | 10             | 283              | 20.21                            |
| Michigan University                   | 13                  | 12             | 2615             | 201.15                           |
