# Supplementary material for: Research trends on the relationship between gut microbiota and colorectal cancer: A bibliometric analysis
Source: PubMed Central journal article supplement (PMC9868464; doi:10.3389/fcimb.2022.1027448), 2023-01-09
Supplement: DataSheet_3.pdf [file DataSheet_3.pdf]

**Table S3: The top 10 most productive scholars in the field of microbiota and colorectal cancer research from 2001-2022.**

| <b>Author</b>              | <b>Publications</b> | <b>H-index</b> | <b>Citations</b> | <b>Citations per-publication</b> |
|----------------------------|---------------------|----------------|------------------|----------------------------------|
| Yu, Jun                    | 17                  | 14             | 1655             | 103.44                           |
| Sung, Joseph J. Y.         | 14                  | 12             | 1496             | 106.86                           |
| Fang, JingYuan             | 12                  | 8              | 1272             | 106.00                           |
| Qin, Huanlong              | 11                  | 10             | 1094             | 99.46                            |
| Gao, Renyuan               | 9                   | 8              | 956              | 106.22                           |
| Khosroushahi, A.Y.         | 9                   | 7              | 196              | 21.78                            |
| Ma, Yanlei                 | 8                   | 7              | 588              | 73.50                            |
| Wang, Yan                  | 8                   | 6              | 127              | 15.88                            |
| Nakatsu, Geicho            | 7                   | 5              | 812              | 116                              |
| Coker, Olabisi Oluwabukola | 7                   | 6              | 375              | 53.57                            |
